# Supplementary material for: Fatal Cases of Seasonal Influenza in Russia in 2015–2016
Source: PubMed Central journal article supplement (PMC5077104; doi:10.1371/journal.pone.0165332), 2016-10-24
Supplement: pone.0165332.s001.pdf [file pone.0165332.s001.pdf]

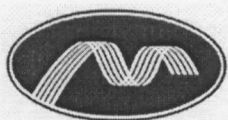

Федеральное бюджетное учреждение науки Государственный научный  
центр вирусологии и биотехнологии «Вектор»  
ФБУН ГНЦ ВБ «ВЕКТОР»

Адрес: 630559 р.п.Кольцово Новосибирского района Новосибирской области  
Телефон: (383) 336-60-10 Факс: (383) 336-74-09 E-mail: vector@vector.nsc.ru <http://www.vector.nsc.ru>  
ОГРН 10554750448122 ИНН 5433161342

Решение Этического Комитета

**ВЫПИСКА** из протокола № 2 д.д. заседания Этического комитета при ФБУН ГНЦ ВБ  
«Вектор»

от « 20 » мая **2008** г.

СЛУШАЛИ: докладчика и исполнителя проекта исследования А.М. Шестопалова (зав. отделом ГНЦ ВБ «Вектор») «Мониторинг за вирусом гриппа А у населения районов Сибири, неблагополучных по гриппу H5N1».

Рецензент проекта – д-р биол. наук, в.н.с. отдела молекулярной вирусологии флавивирусов и вирусных гепатитов И.А. Разумов

ПОСТАНОВИЛИ: Этический комитет при ГНЦ ВБ «Вектор» единогласно одобряет проект исследований «Мониторинг за вирусом гриппа А у населения районов Сибири, неблагополучных по гриппу H5N1» (руководящая организация ГНЦ ВБ «Вектор», исполнитель проекта – Шестопалов А.М., заведующий отделом зоонозных инфекций и гриппа ГНЦ ВБ «Вектор» и утверждает предложенный для рассмотрения пакет документов с учётом внесенных замечаний.

Председатель Этического комитета,  
канд. мед. наук

Ар.А. Сергеев

Секретарь ЭК

Ю. В. Кононова
